# Supplementary material for: Minimum dietary diversity among women of reproductive age in urban Burkina Faso
Source: PubMed Central journal article supplement (PMC7083435; doi:10.1111/mcn.12897), 2019-12-19
Supplement: MCN-16-e12897-s001.pdf [file MCN-16-e12897-s001.pdf]

## Supplementary Appendix

Supplemental Figure 1: Women's food groups consumption in urban Burkina Faso by year of survey

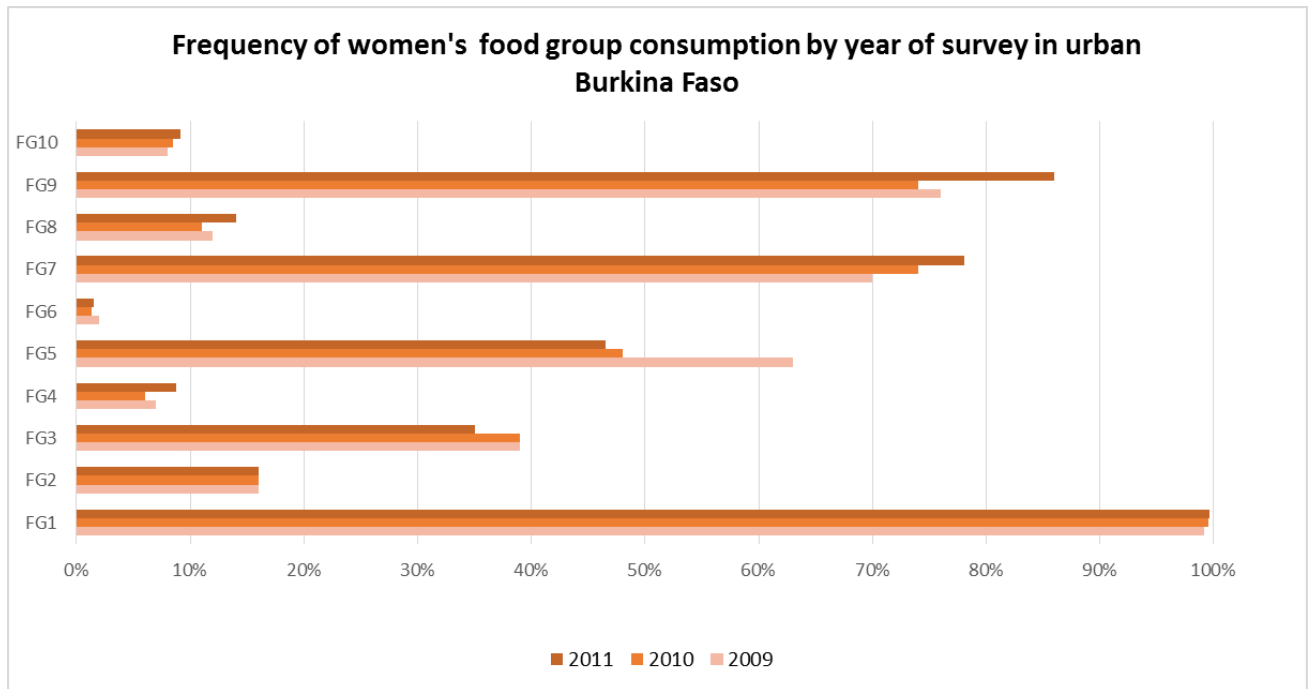

**FG1:** All starchy **FG2:** Beans and peas **FG3:** Nuts and seeds **FG4:**Dairy **FG5:**Flesh foods **FG6:**Eggs  
**FG7:**Vit A rich dark green vegetables **FG8:**Other vit A rich vegetables and fruits **FG9:** Other  
vegetables **FG10:** Other fruits

# Supplemental Table 1

Table S1: Factors associated with MDDw in Ouagadougou and Bobo Dioulasso. Household socioeconomic variables. Results from bivariate logistic regressions\*

| COVARIATES                                            | Overall                      |        |             | Ouagadougou    |        |             | Bobo Dioulasso |        |             |              |        |             |                 |        |             |               |
|-------------------------------------------------------|------------------------------|--------|-------------|----------------|--------|-------------|----------------|--------|-------------|--------------|--------|-------------|-----------------|--------|-------------|---------------|
|                                                       | n                            | MDDw % | OR (CI 95%) | n              | MDDw % | OR (CI 95%) | n              | MDDw % | OR (CI 95%) | n            | MDDw % | OR (CI 95%) | n               | MDDw % | OR (CI 95%) |               |
| Year of survey                                        | 2009                         | 4043   | 32.0        | Ref.           | 1385   | 38.9        | Ref.           | 670    | 22.8        | Ref.         | 1527   | 34.1        | Ref.            | 413    | 14.5        | Ref.          |
|                                                       | 2010                         | 4144   | 27.3        | 0.8(0.7-0.9)   | 1232   | 32.1        | 0.7(0.6-0.9)   | 743    | 20.7        | 0.9(0.7-1.1) | 1732   | 31.0        | 0.9(0.8-1.0)    | 462    | 11.3        | 0.7(0.5-1.1)  |
|                                                       | 2011                         | 4515   | 32.2        | 1.0(0.9-1.1)   | 1437   | 40.8        | 1.1(0.9-1.3)   | 806    | 28.0        | 1.3(1.0-1.7) | 1831   | 31.4        | 0.9(0.8-1.0)    | 431    | 14.4        | 1.0(0.7-1.5)  |
|                                                       | p                            |        |             | <0.001         |        |             | <0.001         |        |             | 0.003        |        |             | 0.117           |        |             | 0.258         |
| Total expenses (quintiles)                            | 1st quintile                 | 2411   | 11.6        | Ref.           | 566    | 14.0        | Ref.           | 588    | 16.7        | Ref.         | 610    | 8.4         | Ref.            | 647    | 7.9         | Ref.          |
|                                                       | 2nd quintile                 | 2317   | 18.3        | 1.7(1.5-2.0)   | 691    | 23.6        | 1.9(1.4-2.6)   | 622    | 19.5        | 1.3(1.0-1.6) | 995    | 15.5        | 2.0(1.4-2.8)    | 309    | 13.6        | 1.8(1.2-2.8)  |
|                                                       | 3rd quintile                 | 2645   | 27.4        | 2.9(2.5-3.4)   | 798    | 30.0        | 2.6(2.0-3.5)   | 518    | 25.3        | 1.7(1.3-2.3) | 1133   | 27.9        | 4.2(3.1-5.8)    | 196    | 19.9        | 3.0(1.8-4.6)  |
|                                                       | 4th quintile                 | 2563   | 38.9        | 4.9(4.2-5.6)   | 926    | 42.8        | 4.6(3.5-6.0)   | 325    | 34.8        | 2.7(1.9-3.7) | 1213   | 38.7        | 6.9(5.1-9.4)    | 99     | 20.2        | 3.0(1.7-5.2)  |
|                                                       | 5th quintile                 | 2378   | 57.3        | 10.2(8.8-11.9) | 997    | 61.6        | 9.9(7.5-12.9)  | 149    | 44.3        | 4.0(2.7-5.9) | 1185   | 55.9        | 13.9(10.2-18.9) | 47     | 42.6        | 8.7(4.5-16.5) |
|                                                       | p                            |        |             | <0.001         |        |             | <0.001         |        |             | <0.001       |        |             | <0.001          |        |             | <0.001        |
| Socioeconomic score                                   | Low                          | 4293   | 16.7        | Ref.           | 890    | 17.9        | Ref.           | 1347   | 19.8        | Ref.         | 1001   | 16.3        | Ref.            | 1055   | 11.9        | Ref.          |
|                                                       | Middle                       | 3845   | 25.0        | 1.7(1.5-1.9)   | 1268   | 27.7        | 1.8(1.4-2.2)   | 653    | 24.7        | 1.3(1.1-1.7) | 1723   | 24.8        | 1.7(1.4-2.1)    | 201    | 11.9        | 1.0(0.5-1.6)  |
|                                                       | High                         | 4564   | 48.3        | 4.7(4.2-5.2)   | 1858   | 53.7        | 5.3(4.4-6.5)   | 219    | 48.0        | 3.7(2.8-5.0) | 2437   | 44.2        | 4.1(3.8-4.9)    | 48     | 48.0        | 6.8(3.8-12.2) |
|                                                       | p                            |        |             | <0.001         |        |             | <0.001         |        |             | 0.03         |        |             | <0.001          |        |             | <0.001        |
| Household dependency ratio score                      | Low                          | 3876   | 33.9        | Ref.           | 801    | 43.1        | Ref.           | 425    | 30.6        | Ref.         | 2141   | 36          | Ref.            | 509    | 13.8        | Ref.          |
|                                                       | Middle                       | 4746   | 30.3        | 0.8(0.8-0.9)   | 1603   | 39.3        | 0.9(0.7-1.0)   | 777    | 25.3        | 0.8(0.6-1.1) | 1864   | 29.3        | 0.7(0.6-0.8)    | 515    | 13.4        | 1.0(0.7-1.4)  |
|                                                       | High                         | 3917   | 27.7        | 0.7(0.7-0.8)   | 1546   | 33.4        | 0.7(0.6-0.8)   | 965    | 20.1        | 0.6(0.5-0.7) | 1130   | 29.9        | 0.8(0.7-0.9)    | 276    | 12.7        | 0.9(0.6-1.4)  |
|                                                       | p                            |        |             | <0.001         |        |             | <0.001         |        |             | 0.008        |        |             | <0.001          |        |             | 0.947         |
| Household youth ratio score                           | Low                          | 3776   | 36.1        | Ref.           | 1003   | 45.0        | Ref.           | 408    | 30.2        | Ref.         | 2002   | 36          | Ref.            | 363    | 17.6        | Ref.          |
|                                                       | Middle                       | 4746   | 31.3        | 0.8(0.7-0.9)   | 1506   | 40.7        | 0.8(0.7-1.0)   | 730    | 24.5        | 0.8(0.6-1.0) | 1998   | 31.6        | 0.8(0.7-0.9)    | 512    | 12.7        | 0.7(0.5-1.0)  |
|                                                       | High                         | 4162   | 24.7        | 0.6(0.5-0.6)   | 1499   | 29.8        | 0.5(0.4-0.6)   | 1077   | 21.5        | 0.6(0.5-0.8) | 1155   | 26.4        | 0.6(0.5-0.7)    | 431    | 10.4        | 0.5(0.4-0.8)  |
|                                                       | p                            |        |             | <0.001         |        |             | <0.001         |        |             | 0.01         |        |             | <0.001          |        |             | 0.009         |
| Sex head of household                                 | Female                       | 1327   | 30.4        | Ref.           | 437    | 37.7        | Ref.           | 159    | 18.9        | Ref.         | 620    | 32.2        | Ref.            | 111    | 13.6        | Ref.          |
|                                                       | Male                         | 11374  | 30.6        | 1.0(0.9-1.1)   | 3579   | 36.6        | 1.0(0.8-1.2)   | 2059   | 24.4        | 1.4(0.9-2.1) | 4541   | 32.6        | 1.0(0.8-1.2)    | 1195   | 10.8        | 1.3(0.7-2.4)  |
|                                                       | p                            |        |             | 0.93           |        |             | 0.668          |        |             | 0.105        |        |             | 0.856           |        |             | 0.403         |
| Age of head of household                              | <30 years                    | 1320   | 31.1        | Ref.           | 379    | 39.3        | Ref.           | 367    | 26.2        | Ref.         | 445    | 31.5        | Ref.            | 129    | 19.4        | Ref.          |
|                                                       | 30-39 years                  | 4699   | 31.4        | 1.0(0.9-1.2)   | 1463   | 39.3        | 1.0(0.8-1.3)   | 1020   | 26          | 1.0(0.8-1.3) | 1727   | 32.8        | 1.1(0.9-1.3)    | 489    | 13.5        | 0.6(0.4-1.1)  |
|                                                       | 40-49 years                  | 3943   | 29.9        | 0.9(0.8-1.1)   | 1283   | 36.8        | 0.9(0.7-1.1)   | 585    | 20.5        | 0.7(0.5-1.0) | 1660   | 32.1        | 1.0(0.8-1.3)    | 415    | 12.8        | 0.6(0.4-1.0)  |
|                                                       | >50 years                    | 2644   | 30.3        | 1.0(0.8-1.1)   | 881    | 35          | 0.8(0.6-1.1)   | 242    | 20.3        | 0.7(0.5-1.1) | 837    | 32.4        | 1.0(0.8-1.3)    | 198    | 10.6        | 0.5(0.3-0.9)  |
|                                                       | p                            |        |             | 0.477          |        |             | 0.153          |        |             | 0.062        |        |             | 0.937           |        |             | 0.162         |
| Head of household education status                    | None                         | 5871   | 23.4        | Ref.           | 1604   | 30.3        | Ref.           | 1125   | 19.9        | Ref.         | 2284   | 25.0        | Ref.            | 858    | 10.6        | Ref.          |
|                                                       | Primary school               | 1276   | 31.0        | 1.5(1.3-1.7)   | 337    | 30.9        | 1.0(0.8-1.3)   | 340    | 25.3        | 1.4(1.0-1.8) | 494    | 37.3        | 1.8(1.5-2.2)    | 105    | 21.0        | 2.2(1.3-3.7)  |
|                                                       | Secondary school             | 2573   | 29.2        | 1.4(1.2-1.5)   | 892    | 33.6        | 1.2(1.0-1.4)   | 440    | 26.1        | 1.4(1.1-1.8) | 986    | 29.9        | 1.3(1.1-1.5)    | 255    | 16.5        | 1.0(0.7-1.5)  |
|                                                       | Higher education             | 2975   | 45.7        | 2.8(2.5-3.0)   | 1180   | 52.3        | 2.5(2.2-2.9)   | 312    | 34.6        | 2.1(1.6-2.8) | 1396   | 44.1        | 2.4(2.1-2.7)    | 87     | 21.8        | 2.4(1.4-4.1)  |
|                                                       | p                            |        |             | <0.001         |        |             | <0.001         |        |             | <0.001       |        |             | <0.001          |        |             | <0.001        |
| Head of household receives regular aid (bourse/aid)   | No                           | 12084  | 31.0        | Ref.           | 3885   | 37.8        | Ref.           | 2115   | 24.2        | Ref.         | 4857   | 32.9        | Ref.            | 1227   | 13.9        | Ref.          |
|                                                       | Yes                          | 613    | 21.2        | 0.6(0.5-0.7)   | 131    | 29.8        | 0.7(0.5-1.0)   | 103    | 21.4        | 0.9(0.5-1.4) | 302    | 21.5        | 0.6(0.4-0.7)    | 77     | 5.2         | 0.3(0.1-0.9)  |
|                                                       | p                            |        |             | <0.001         |        |             | 0.054          |        |             | 0.786        |        |             | <0.001          |        |             | 0.016         |
| Head of household has regular income                  | Yes                          | 2851   | 42.5        | Ref.           | 2840   | 32.8        | Ref.           | 367    | 27.8        | Ref.         | 1195   | 42.2        | Ref.            | 1191   | 12.2        | Ref.          |
|                                                       | No                           | 9846   | 27.1        | 2.0(1.8-2.2)   | 1176   | 48.1        | 2.0(1.7-2.3)   | 1851   | 23.3        | 1.3(1.0-1.6) | 3964   | 29.3        | 1.8(1.5-2.0)    | 113    | 25.7        | 2.5(1.6-3.9)  |
|                                                       | p                            |        |             | <0.001         |        |             | <0.001         |        |             | 0.048        |        |             | <0.001          |        |             | <0.001        |
| Household food security-HFIAS categorization          | Food secure + MM Food Secure | 6182   | 40.6        | Ref.           | 2039   | 49.7        | Ref.           | 705    | 32.8        | Ref.         | 2874   | 40.3        | Ref.            | 564    | 19.2        | Ref.          |
|                                                       | Severely food insecure       | 6519   | 21.0        | 0.4(0.3-0.4)   | 1977   | 25          | 0.3(0.3-0.4)   | 1514   | 20          | 0.5(0.4-0.6) | 2286   | 22.1        | 0.4(0.4-0.5)    | 742    | 8.9         | 0.4(0.3-0.6)  |
|                                                       | p                            |        |             | <0.001         |        |             | <0.001         |        |             | <0.001       |        |             | <0.001          |        |             | <0.001        |
| Household food stocks                                 | None                         | 4465   | 22.0        | Ref.           | 1336   | 25.2        | Ref.           | 973    | 16.9        | Ref.         | 1807   | 24.7        | Ref.            | 349    | 9.2         | Ref.          |
|                                                       | At least 5 kgs of cereals    | 4452   | 28.7        | 1.4(1.3-1.6)   | 1328   | 33.6        | 1.1(0.9-1.4)   | 915    | 26.9        | 1.8(1.5-2.3) | 1733   | 30.5        | 1.3(1.2-1.5)    | 476    | 12.0        | 1.3(0.9-2.1)  |
|                                                       | At least 20 kgs of cereals   | 3784   | 42.8        | 2.7(2.4-2.9)   | 1352   | 53.6        | 3.4(2.9-4.0)   | 331    | 37.2        | 2.9(2.2-3.9) | 1620   | 42.5        | 2.2(1.9-2.6)    | 481    | 17.7        | 2.1(1.4-3.3)  |
|                                                       | p                            |        |             | <0.001         |        |             | <0.001         |        |             | <0.001       |        |             | <0.001          |        |             | 0.001         |
| Household owns vegetable garden                       | No                           | 10649  | 32.0        | Ref.           | 3452   | 40.1        | Ref.           | 1757   | 24          | Ref.         | 4520   | 32.9        | Ref.            | 920    | 12.2        | Ref.          |
|                                                       | Yes                          | 2053   | 23.1        | 0.7(0.6-0.7)   | 564    | 22          | 0.4(0.3-0.5)   | 462    | 24.2        | 1.0(0.8-1.3) | 641    | 27.5        | 0.8(0.6-0.9)    | 386    | 16.1        | 1.4(1.0-1.9)  |
|                                                       | p                            |        |             | <0.001         |        |             | <0.001         |        |             | 0.899        |        |             | 0.005           |        |             | 0.033         |
| Household owns ox/bullock                             | No                           | 12466  | 30.5        | Ref.           | 3988   | 37.6        | Ref.           | 2206   | 24.1        | Ref.         | 5079   | 32.0        | Ref.            | 1193   | 12.4        | Ref.          |
|                                                       | Yes                          | 236    | 33.1        | 1.1(0.9-1.5)   | 28     | 35.7        | 0.9(0.4-2.0)   | 13     | 15.4        | 0.6(0.1-2.6) | 82     | 48.8        | 2.0(1.3-3.1)    | 113    | 23.0        | 2.1(1.4-3.4)  |
|                                                       | p                            |        |             | <0.001         |        |             | 0.84           |        |             | 0.443        |        |             | 0.002           |        |             | 0.003         |
| Household owns small livestock and/or poultry         | No                           | 10355  | 31.1        | Ref.           | 3339   | 38.4        | Ref.           | 1890   | 24.3        | Ref.         | 4398   | 31.7        | Ref.            | 728    | 10.7        | Ref.          |
|                                                       | Yes                          | 655    | 28.3        | 0.9(0.8-1.0)   | 677    | 33.4        | 0.8(0.7-1.0)   | 329    | 22.5        | 0.9(0.7-1.2) | 763    | 35.3        | 1.2(1.0-1.4)    | 578    | 16.6        | 1.7(1.2-2.3)  |
|                                                       | p                            |        |             | <0.001         |        |             | 0.013          |        |             | 0.48         |        |             | 0.057           |        |             | <0.001        |
| Household reports monthly expenses on meat            | No                           | 10868  | 24.8        | Ref.           | 3297   | 30.4        | Ref.           | 2116   | 22.4        | Ref.         | 4200   | 25.3        | Ref.            | 1255   | 12.0        | Ref.          |
|                                                       | Yes                          | 1834   | 64.9        | 5.6(5.0-6.2)   | 719    | 70.4        | 5.4(4.6-6.5)   | 103    | 57.3        | 4.6(3.1-7.0) | 961    | 62.6        | 4.9(4.3-5.7)    | 51     | 45.1        | 6.0(3.4-10.7) |
|                                                       | p                            |        |             | <0.001         |        |             | <0.001         |        |             | <0.001       |        |             | <0.001          |        |             | <0.001        |
| Household reports monthly expenses on fish            | No                           | 5456   | 23.8        | Ref.           | 1550   | 31.1        | Ref.           | 985    | 17.9        | Ref.         | 2275   | 26.4        | Ref.            | 646    | 6.4         | Ref.          |
|                                                       | Yes                          | 7246   | 35.6        | 1.8(1.6-1.9)   | 2466   | 41.6        | 1.6(1.4-1.8)   | 1234   | 29.0        | 1.9(1.5-2.3) | 2886   | 36.9        | 1.6(1.4-1.8)    | 660    | 20.2        | 3.7(2.6-5.4)  |
|                                                       | p                            |        |             | <0.001         |        |             | <0.001         |        |             | <0.001       |        |             | <0.001          |        |             | <0.001        |
| Household reports monthly expenses on prepared dishes | No                           | 7736   | 31.5        | Ref.           | 2260   | 39.7        | Ref.           | 1135   | 24.4        | Ref.         | 3340   | 34.3        | Ref.            | 1001   | 11.3        | Ref.          |
|                                                       | Yes                          | 4966   | 29.1        | 0.9(0.8-1.0)   | 1756   | 34.8        | 0.8(0.7-0.9)   | 1084   | 23.6        | 1.0(0.8-1.2) | 1821   | 28.5        | 0.8(0.7-0.9)    | 305    | 20.0        | 2.0(1.4-2.8)  |
|                                                       | p                            |        |             | 0.006          |        |             | 0.001          |        |             | 0.732        |        |             | <0.001          |        |             | <0.001        |
| Place of choice to purchase food                      | Other                        | 3144   | 17.8        | Ref.           | 1110   | 20.8        | Ref.           | 1150   | 21.2        | Ref.         | 4749   | 33.9        | Ref.            | 481    | 7.3         | Ref.          |
|                                                       | Market                       | 9480   | 34.7        | 2.4(2.2-2.7)   | 2876   | 44          | 3.0(2.5-3.5)   | 1041   | 26.6        | 1.3(1.1-1.6) | 403    | 12.7        | 0.3(0.2-0.4)    | 814    | 17.1        | 2.6(1.6-3.5)  |
|                                                       | p                            |        |             | <0.001         |        |             | <0.001         |        |             | 0.005        |        |             | <0.001          |        |             | <0.001        |
| Reason to choose place of food purchase-large choice  | No                           | 10538  | 27.7        | Ref.           | 3176   | 33.4        | Ref.           | 1875   | 21.4        | Ref.         | 4355   | 30.4        | Ref.            | 1132   | 11.9        | Ref.          |
|                                                       | Yes                          | 2086   | 44.6        | 2.1(1.9-2.3)   | 810    | 53.8        | 2.3(2.0-2.7    |        |             |              |        |             |                 |        |             |               |
